# Supplementary material
Source: PubMed Central journal article supplement (PMC3492937)
Supplement: NIHMS417816-supplement-Table_S1.pdf [file NIHMS417816-supplement-Table_S1.pdf]

Table S1

| <b>Cell type</b>                                                  | <b>Cell Name</b> | <b>Doubling times</b><br>(Hour & R <sup>2</sup> ) |
|-------------------------------------------------------------------|------------------|---------------------------------------------------|
| Human Hepatocellular Carcinoma                                    | PLC/PRF/5        | 39.7 (0.94)                                       |
| Human Hepatocellular Carcinoma                                    | HuH-7            | 28.9 (0.976)                                      |
| Human Hepatocellular Carcinoma                                    | SK-Hep-1         | 23.1 (0.976)                                      |
| Human Colorectal Cancer<br>(derived from fresh surgical specimen) | CSCL-04-Ke       | 20.1 (0.917)                                      |
| Human Colon Cancer<br>(derived from fresh surgical specimen)      | CSCL-03-Ba       | 30.0 (0.989)                                      |
| Human Colon Cancer<br>(derived from fresh surgical specimen)      | CSCL-02-Ne       | 34.5 (0.962)                                      |
| Human Benign Liver Cell                                           | THLE-2           | 40.8 (0.964)                                      |
